# Supplementary material for: LPAR1, Correlated With Immune Infiltrates, Is a Potential Prognostic Biomarker in Prostate Cancer
Source: Front Oncol. 2020 Jun 10;10:846. doi: 10.3389/fonc.2020.00846 (PMC7325998; doi:10.3389/fonc.2020.00846)
Supplement: Supplementary file 1 [file Table_1.XLSX]

## Sheet: Sheet1
Table S1
Identification of differentially expressed genes (including 595 up DEGs and 269 down DEGs) among patients with the high and low expression for LPAR1.
Gene Symbol	logFC	p Value	FDR
LPAR1	1.14872	1.44e-90	3.39e-86
ARHGAP20	1.4975	3.67e-80	2.89e-76
ATP2B4	1.27775	6.57e-75	3.88e-71
TGFBR3	1.07089	2.38e-72	1.12e-68
DDR2	1.17722	1.45e-71	5.71e-68
FRMD6	1.15407	3.88e-71	1.31e-67
CACHD1	1.19911	5.02e-70	1.48e-66
NHS	1.17603	2.41e-69	5.69e-66
SPON1	1.45469	1.59e-68	3.4e-65
RBMS3	1.06438	9.65e-66	1.75e-62
PGR	1.38413	1.3e-65	2.19e-62
DAAM2	1.31343	3.79e-65	5.59e-62
FGF10	1.68179	2.36e-64	3.28e-61
TNS1	1.24601	9.72e-64	1.27e-60
GPR161	1.06073	1.04e-63	1.3e-60
MCC	1.13431	2.47e-63	2.78e-60
FAT4	1.41482	6.53e-63	7e-60
TRPC4	1.24809	7.21e-63	7.41e-60
ANGPT1	1.46728	1.02e-62	9.61e-60
ADGRA2	1.22345	2.37e-62	2.15e-59
ZEB2	1.11129	7.89e-62	6.9e-59
METTL24	1.36882	4.36e-61	3.43e-58
LONRF3	1.27481	8.5e-61	6.47e-58
MAGI2-AS3	1.08587	1.29e-60	9.53e-58
EDNRA	1.1596	2.29e-60	1.64e-57
IRAK3	1.03602	3.58e-60	2.49e-57
NID1	1.11011	7.63e-60	5.15e-57
VCL	1.028	8.94e-60	5.86e-57
ABCC9	1.24214	4.12e-58	2.49e-55
KSR1	1.04	6.1e-58	3.51e-55
KIRREL1	1.04479	7.75e-58	4.36e-55
MAMLD1	1.16781	7.98e-58	4.38e-55
AOX1	1.48572	2.61e-57	1.4e-54
PIEZO2	1.13512	3.85e-57	2.02e-54
CCDC85A	1.39846	2.72e-56	1.4e-53
ITGB3	1.33855	4.04e-56	2.03e-53
ARHGAP23	1.10211	1.29e-55	6.09e-53
PCDH7	1.34792	1.85e-55	8.55e-53
TRHDE	1.54723	2.31e-55	1.05e-52
CLMP	1.07897	4.74e-55	2.11e-52
STOX2	1.16826	5.14e-55	2.25e-52
ZNF804A	1.4394	5.71e-55	2.45e-52
TSPAN18	1.12943	6.03e-55	2.54e-52
GPRASP1	1.01576	2.58e-54	1.07e-51
TMEM252	1.8269	3.18e-54	1.27e-51
NT5E	1.07578	3.61e-54	1.42e-51
PAK3	1.32579	4.13e-54	1.6e-51
EPHA3	1.26809	5.96e-54	2.27e-51
LEPR	1.08444	1.11e-53	4.08e-51
SLC8A1	1.25023	1.14e-53	4.13e-51
PEAK1	1.03677	1.5e-53	5.36e-51
CAV2	1.00578	1.68e-53	5.93e-51
LRRK2	1.12881	3.98e-53	1.34e-50
HRH2	1.36842	7.72e-53	2.57e-50
C8orf88	1.28537	1.35e-52	4.36e-50
AHNAK2	1.30172	1.43e-52	4.55e-50
MYOCD	1.46135	2.68e-52	8.32e-50
EYA4	1.25747	3.1e-52	9.51e-50
ADAMTS9-AS2	1.21613	5.19e-52	1.57e-49
ADGRL3	1.42942	6.58e-52	1.97e-49
PCDH18	1.14678	7.43e-52	2.19e-49
MYLK	1.3423	7.6e-52	2.21e-49
NYNRIN	1.22423	9.74e-52	2.8e-49
SLC16A7	1.11243	9.89e-52	2.81e-49
STARD8	1.04144	1.52e-51	4.28e-49
IL33	1.0454	1.02e-50	2.76e-48
GNAO1	1.22793	3.61e-50	9.37e-48
OGN	1.35618	5.47e-50	1.37e-47
ALDH1L2	1.19969	9.56e-50	2.35e-47
ITGA9	1.07102	2.03e-49	4.85e-47
MYOF	1.07681	5.21e-49	1.19e-46
NID2	1.17467	5.81e-49	1.32e-46
MAMDC2	1.18738	7.8e-49	1.74e-46
FLJ44635	1.34445	8.56e-49	1.87e-46
NHSL2	1.34445	8.56e-49	1.87e-46
TMEM132C	1.6521	1.17e-48	2.53e-46
CAV1	1.09574	1.34e-48	2.86e-46
GCNT4	1.1049	2.65e-48	5.29e-46
DCHS2	1.43202	2.74e-48	5.41e-46
COL4A4	1.07872	6.57e-48	1.26e-45
COL6A3	1.11037	7.28e-48	1.37e-45
ADRA1A	1.60217	1.14e-47	2.14e-45
PPP1R12B	1.00241	5.41e-47	9.53e-45
VWA5A	1.01677	5.61e-47	9.74e-45
MSRB3	1.08817	8.04e-47	1.34e-44
FLRT2	1.21001	1.03e-46	1.68e-44
SLC47A1	1.11174	2.06e-46	3.31e-44
VSTM4	1.02888	2.51e-46	3.95e-44
FAXDC2	1.04285	2.6e-46	4.06e-44
TIMP3	1.30658	6.01e-46	9.28e-44
ZNF154	1.02458	6.47e-46	9.91e-44
GJA1	1.02312	7.08e-46	1.08e-43
SHISAL1	1.34929	7.87e-46	1.18e-43
ANKRD33B	1.20903	9.1e-46	1.35e-43
AOC3	1.04416	9.17e-46	1.35e-43
ZNF536	1.19813	1.02e-45	1.49e-43
FBN1	1.05579	1.17e-45	1.7e-43
ADCY5	1.10658	2.01e-45	2.84e-43
PRKCB	1.28779	2.85e-45	3.98e-43
C3orf70	1.0648	5.12e-45	7.03e-43
COL4A6	1.37318	5.32e-45	7.26e-43
NLGN3	1.09449	5.41e-45	7.29e-43
TMLHE	1.01647	7.15e-45	9.42e-43
OLFML1	1.08105	1.61e-44	2.08e-42
FAT3	1.46498	1.83e-44	2.36e-42
SORBS1	1.19859	2.06e-44	2.63e-42
TNC	1.06755	2.88e-44	3.61e-42
PDZRN4	1.22696	5.4e-44	6.68e-42
MRVI1	1.11999	6.6e-44	8.12e-42
HS3ST3A1	1.18621	7.21e-44	8.73e-42
FLNA	1.16897	1.13e-43	1.34e-41
KCNQ5	1.24471	2.33e-43	2.69e-41
CNTN1	1.21966	4.71e-43	5.32e-41
TNXB	1.07034	5.2e-43	5.84e-41
PCDH10	1.21064	6.33e-43	6.98e-41
NAV2	1.07323	6.93e-43	7.61e-41
C7	1.41098	9.62e-43	1.04e-40
RGS7BP	1.33282	1.1e-42	1.18e-40
KLHL14	1.21595	1.24e-42	1.31e-40
INMT-MINDY4	1.48146	1.74e-42	1.8e-40
SCN7A	1.28508	2e-42	2.05e-40
ZNF185	1.02326	2.59e-42	2.6e-40
SCUBE3	1.07274	2.87e-42	2.85e-40
SCARA3	1.00433	4.73e-42	4.62e-40
SORCS2	1.15129	6.5e-42	6.27e-40
TMEM35A	1.43866	6.6e-42	6.33e-40
C2orf88	1.33549	8.29e-42	7.9e-40
MXRA5	1.01412	9.21e-42	8.7e-40
MYH11	1.31557	9.32e-42	8.77e-40
KCNS2	1.37035	1.35e-41	1.24e-39
PTGER2	1.05464	1.72e-41	1.57e-39
TRPC3	1.41433	1.89e-41	1.71e-39
TLR1	1.13146	2.92e-41	2.59e-39
PRKG1	1.09585	3.02e-41	2.67e-39
ADGRE2	1.00873	6.96e-41	5.82e-39
MEIS2	1.07144	1.02e-40	8.48e-39
PCDH9	1.26454	1.04e-40	8.59e-39
GFRA1	1.22868	1.07e-40	8.75e-39
BNC2	1.02802	1.31e-40	1.06e-38
COL14A1	1.14722	1.61e-40	1.29e-38
PTCHD1	1.31617	3.12e-40	2.44e-38
EFEMP1	1.00651	3.44e-40	2.68e-38
MET	1.07362	3.53e-40	2.74e-38
ADAM19	1.0109	6.54e-40	4.98e-38
ASPA	1.35739	7.35e-40	5.54e-38
MAP1A	1.04172	7.46e-40	5.61e-38
SYNPO2	1.24111	7.98e-40	5.98e-38
EVX2	1.75246	9.46e-40	6.98e-38
PLBD1-AS1	1.432	1.74e-39	1.26e-37
ABCA8	1.04303	1.76e-39	1.27e-37
ASXL3	1.14668	1.77e-39	1.27e-37
RAB9B	1.04042	1.92e-39	1.37e-37
FAM83B	1.67925	1.98e-39	1.4e-37
ADCYAP1R1	1.43996	2.45e-39	1.72e-37
JPH4	1.41911	2.95e-39	2.06e-37
MPP2	1.06924	4.44e-39	3.05e-37
CHRDL1	1.30223	7.75e-39	5.2e-37
ADAMTS5	1.21431	1.1e-38	7.27e-37
HEPH	1.00252	1.91e-38	1.23e-36
CFH	1.00132	5.71e-38	3.51e-36
BHMT2	1.02092	8.29e-38	5.01e-36
ABCD2	1.14874	8.49e-38	5.11e-36
CLIC6	1.13251	1.07e-37	6.41e-36
FREM2	1.36819	1.45e-37	8.49e-36
RHBDL3	1.11441	2.7e-37	1.54e-35
EMILIN3	1.0119	3.14e-37	1.77e-35
PIK3CG	1.3038	6.47e-37	3.46e-35
LAMA2	1.02889	6.87e-37	3.67e-35
KLHL4	1.24379	7.29e-37	3.88e-35
FOXF1	1.05387	9.46e-37	4.96e-35
TRPC6	1.03682	1.04e-36	5.45e-35
GVINP1	1.20918	1.39e-36	7.19e-35
PTGIS	1.0839	1.41e-36	7.28e-35
ANGPTL1	1.30535	1.41e-36	7.3e-35
LOC400464	1.08562	1.85e-36	9.5e-35
MRGPRE	1.39131	2.54e-36	1.29e-34
CAPN6	1.59732	3.44e-36	1.71e-34
SEMA6D	1.10367	5.15e-36	2.53e-34
SNAI2	1.1857	5.71e-36	2.79e-34
GDF7	1.20634	6.98e-36	3.36e-34
NTRK3	1.19414	9.47e-36	4.53e-34
NTRK2	1.13015	1.01e-35	4.78e-34
XKR5	1.15869	1.99e-35	9.25e-34
KIAA1210	1.66509	2.46e-35	1.14e-33
SLC18A2	1.63546	3.8e-35	1.73e-33
P2RY12	1.11737	5.84e-35	2.58e-33
EDIL3	1.02908	6.7e-35	2.93e-33
LOC283856	1.05068	6.95e-35	3.03e-33
NCOA7	1.12003	7.06e-35	3.07e-33
SPOCK3	1.16391	9.1e-35	3.89e-33
PCYT1B	1.23468	9.18e-35	3.92e-33
ADAMTS9-AS1	1.44515	1.75e-34	7.3e-33
LRFN5	1.11093	4e-34	1.59e-32
CPED1	1.06582	6.34e-34	2.44e-32
TMEM200B	1.01552	7.54e-34	2.86e-32
TSPAN11	1.00852	9.64e-34	3.59e-32
ROR2	1.04858	1.1e-33	4.02e-32
HSD11B1	1.09625	1.24e-33	4.53e-32
GABRQ	1.66845	1.36e-33	4.93e-32
FGD5P1	1.26397	1.43e-33	5.16e-32
RND3	1.00308	1.74e-33	6.19e-32
TENM3	1.02697	2.17e-33	7.67e-32
PDE1C	1.47245	2.86e-33	1e-31
SRD5A2	1.32315	3.36e-33	1.16e-31
CAMK1G	1.07025	3.88e-33	1.34e-31
ALDH1A2	1.0477	4.8e-33	1.64e-31
ADCY7	1.10884	6.35e-33	2.14e-31
FENDRR	1.12062	8.77e-33	2.92e-31
GLIS1	1.15774	1.01e-32	3.32e-31
MMP16	1.1025	1.46e-32	4.72e-31
NECAB1	1.03413	1.84e-32	5.85e-31
NRG2	1.16536	2.93e-32	9.11e-31
ENPP6	1.29522	4.33e-32	1.32e-30
PRIMA1	1.16703	4.8e-32	1.46e-30
NRK	1.33386	4.9e-32	1.49e-30
KLHL33	1.22156	5.08e-32	1.54e-30
CCDC27	1.18915	5.39e-32	1.62e-30
GCOM1	1.0229	6.73e-32	2e-30
CCDC80	1.04909	6.9e-32	2.04e-30
SYT10	1.57381	1.1e-31	3.19e-30
MASP1	1.27863	1.22e-31	3.53e-30
PDE5A	1.01674	1.25e-31	3.62e-30
SYNM	1.14091	1.31e-31	3.78e-30
FAT2	1.37238	1.57e-31	4.48e-30
CHI3L2	1.28469	2.34e-31	6.55e-30
KCNT2	1.21486	2.47e-31	6.85e-30
SERPINB5	1.58183	2.48e-31	6.86e-30
SRPX	1.01686	2.63e-31	7.25e-30
KANK4	1.27047	2.85e-31	7.81e-30
LRP1B	1.3766	6.08e-31	1.61e-29
NDNF	1.22385	7.61e-31	1.99e-29
DNM1P46	1.19174	8.1e-31	2.11e-29
JAKMIP2	1.0568	8.15e-31	2.12e-29
AVPR1A	1.06384	8.65e-31	2.23e-29
CSRNP3	1.01919	1.22e-30	3.11e-29
HOXD13	1.22831	1.67e-30	4.21e-29
ZNF366	1.09382	2.47e-30	6.11e-29
EPHA2	1.11319	3.03e-30	7.41e-29
CSF2RB	1.05243	4.64e-30	1.11e-28
PRDM8	1.32097	5.08e-30	1.2e-28
LINC00908	1.06641	5.76e-30	1.36e-28
FLNC	1.18011	1.03e-29	2.35e-28
NTN1	1.00034	1.66e-29	3.74e-28
SNCAIP	1.00265	2.29e-29	5.08e-28
LYVE1	1.13027	2.62e-29	5.8e-28
ATRNL1	1.13884	2.67e-29	5.87e-28
PPARGC1A	1.11448	2.93e-29	6.4e-28
IQSEC3	1.13369	3.13e-29	6.83e-28
GLDN	1.20704	3.6e-29	7.79e-28
LMOD1	1.04213	4.63e-29	9.91e-28
SEMA3A	1.121	4.96e-29	1.06e-27
CCBE1	1.33122	4.97e-29	1.06e-27
SLC39A2	1.59677	4.97e-29	1.06e-27
FILIP1L	1.01562	7.45e-29	1.56e-27
MMRN1	1.13126	7.74e-29	1.62e-27
SORCS1	1.1554	9.44e-29	1.96e-27
IGSF1	1.48328	1.01e-28	2.09e-27
LINC01679	1.00703	1.08e-28	2.23e-27
STAC	1.36146	1.47e-28	2.97e-27
HOXD12	1.44647	1.58e-28	3.18e-27
C1QTNF7	1.04141	1.77e-28	3.53e-27
TAGAP	1.03622	2.01e-28	3.98e-27
LOC101927359	1.09282	4.67e-28	8.87e-27
FLRT3	1.231	4.83e-28	9.14e-27
INAVA	1.23226	4.89e-28	9.26e-27
TSLP	1.10256	5.41e-28	1.02e-26
RARRES1	1.26971	5.58e-28	1.05e-26
SERTM2	1.49057	6.18e-28	1.16e-26
UBXN10	1.10387	7.1e-28	1.32e-26
DRD1	1.11367	1.26e-27	2.29e-26
SMOC1	1.27608	1.81e-27	3.25e-26
GPM6A	1.50239	2.01e-27	3.59e-26
RNF112	1.1748	3.06e-27	5.38e-26
HAS2	1.15773	3.8e-27	6.64e-26
GRIN2A	1.28414	4.18e-27	7.27e-26
SUPT20HL1	1.45827	5.56e-27	9.52e-26
RPE65	1.78408	6.84e-27	1.16e-25
RXYLT1-AS1	1.89752	8.6e-27	1.45e-25
PTPRC	1.07205	1.41e-26	2.31e-25
HRASLS5	1.11801	1.41e-26	2.31e-25
NRG1	1.18853	1.52e-26	2.48e-25
PGM5	1.12007	1.66e-26	2.71e-25
KIAA0408	1.32044	1.77e-26	2.88e-25
GAS1RR	1.0058	2.05e-26	3.31e-25
CLVS2	1.26413	2.12e-26	3.42e-25
CCDC178	1.05896	3.45e-26	5.44e-25
ZNF728	1.28916	3.65e-26	5.75e-25
LINC01336	1.1924	4.85e-26	7.56e-25
LINC00968	1.40712	5.59e-26	8.65e-25
TP63	1.38378	6.09e-26	9.36e-25
CA14	1.15603	6.59e-26	1.01e-24
PAK5	1.23868	7e-26	1.07e-24
RBFOX1	1.03389	8e-26	1.21e-24
CXCL5	1.31845	9.26e-26	1.4e-24
ITPRIPL1	1.00686	1.02e-25	1.53e-24
PIK3C2G	1.61355	1.03e-25	1.54e-24
ANO5	1.03809	1.89e-25	2.76e-24
KCNA3	1.25301	1.9e-25	2.77e-24
CLCA4	1.94847	2.63e-25	3.79e-24
TMEM200C	1.07594	2.68e-25	3.87e-24
XPNPEP2	1.08767	2.94e-25	4.21e-24
LINC00683	1.00532	3.45e-25	4.9e-24
FHL5	1.01648	3.63e-25	5.15e-24
CYTL1	1.03499	3.83e-25	5.42e-24
FRMD7	1.38042	4.07e-25	5.76e-24
COL17A1	1.30312	4.61e-25	6.49e-24
HOXD10	1.00795	4.79e-25	6.74e-24
B3GALT2	1.07403	5.74e-25	8.03e-24
PRSS12	1.00955	5.74e-25	8.03e-24
HMCN1	1.05583	9.01e-25	1.23e-23
ADGRE3	1.164	1.27e-24	1.72e-23
IL21-AS1	1.60908	1.51e-24	2.03e-23
MLC1	1.48351	1.64e-24	2.19e-23
KCNJ3	1.5253	2.68e-24	3.51e-23
LAX1	1.16271	4.2e-24	5.4e-23
FGF10-AS1	1.31613	5.32e-24	6.8e-23
SCN2B	1.04516	5.46e-24	6.97e-23
THSD7B	1.06941	6.23e-24	7.93e-23
KIAA1211	1.0276	6.83e-24	8.62e-23
ADAMTS6	1.15078	7.21e-24	9.06e-23
C3	1.06625	1.01e-23	1.26e-22
FGFR2	1.22962	1.19e-23	1.47e-22
MAS1	1.29496	1.76e-23	2.14e-22
CDH17	1.34065	1.85e-23	2.24e-22
PENK	1.46854	2.06e-23	2.48e-22
NRXN1	1.2211	2.54e-23	3.04e-22
ITGB6	1.08503	3.05e-23	3.6e-22
LINC02478	1.08503	3.05e-23	3.6e-22
IL7R	1.11099	3.11e-23	3.68e-22
HHIP	1.05528	3.16e-23	3.73e-22
SCARA5	1.45665	4.17e-23	4.88e-22
LOC100506688	1.14694	4.23e-23	4.95e-22
ITGA4	1.02335	5.26e-23	6.11e-22
PLA2G4D	1.83391	6e-23	6.93e-22
CFTR	1.41491	6.14e-23	7.07e-22
LOC101929106	1.30469	7.32e-23	8.38e-22
SLITRK2	1.28471	8.45e-23	9.63e-22
LOC654780	1.45918	1.16e-22	1.3e-21
HAS3	1.21924	1.19e-22	1.34e-21
GPR20	1.00534	1.21e-22	1.36e-21
SLC14A1	1.26629	1.34e-22	1.5e-21
ATCAY	1.07381	1.62e-22	1.79e-21
CTD-2270F17.1	1.04696	2.09e-22	2.28e-21
PROM1	1.40081	2.31e-22	2.52e-21
CHAD	1.00933	3.05e-22	3.27e-21
DPT	1.29878	3.12e-22	3.34e-21
CLCA2	1.68549	3.85e-22	4.1e-21
DGKG	1.0146	4.63e-22	4.89e-21
RNF126P1	1.02638	4.96e-22	5.22e-21
DSC3	1.12073	5.33e-22	5.58e-21
XCR1	1.16702	6.21e-22	6.46e-21
EMX2OS	1.33333	7.18e-22	7.44e-21
FMO2	1.01761	8.86e-22	9.1e-21
HMGCLL1	1.19496	8.94e-22	9.18e-21
BMP3	1.28511	9.12e-22	9.36e-21
DUOX1	1.00228	1.13e-21	1.15e-20
IP6K3	1.27269	1.72e-21	1.73e-20
PCP4L1	1.1227	2.1e-21	2.1e-20
LGR6	1.27991	2.61e-21	2.58e-20
RBFOX3	1.17941	3.31e-21	3.25e-20
HIF3A	1.02726	3.33e-21	3.27e-20
TEX26	1.17529	3.55e-21	3.48e-20
MCF2	1.03511	3.67e-21	3.59e-20
VIT	1.1407	4.22e-21	4.1e-20
KCNJ15	1.147	4.58e-21	4.44e-20
OR7A5	1.2942	5.48e-21	5.28e-20
CXCR2	1.18522	6.16e-21	5.9e-20
GALNT5	1.00004	6.45e-21	6.17e-20
NCAM1	1.13005	7.55e-21	7.17e-20
ISM2	1.09303	7.59e-21	7.2e-20
CR1	1.08806	8.46e-21	8.01e-20
DUOX2	1.02287	9.87e-21	9.28e-20
TNS4	1.31131	1.27e-20	1.18e-19
LINGO2	1.49527	1.28e-20	1.2e-19
MUC4	1.42992	1.32e-20	1.23e-19
ESPNL	1.15641	1.39e-20	1.29e-19
P2RX1	1.05213	1.58e-20	1.45e-19
TAAR1	1.54794	1.58e-20	1.46e-19
DCAF12L1	1.31573	1.82e-20	1.66e-19
L1CAM	1.08487	2.61e-20	2.36e-19
CYP24A1	1.53903	3.14e-20	2.82e-19
TPRXL	1.08159	4.38e-20	3.87e-19
EPHB1	1.03659	4.47e-20	3.95e-19
LOC158434	1.23036	6.84e-20	5.95e-19
LOC102724804	1.11319	7.37e-20	6.38e-19
GPR174	1.23046	8.75e-20	7.53e-19
CHRNA4	1.41089	9.7e-20	8.31e-19
PLP1	1.2747	1.1e-19	9.37e-19
IL1RL1	1.0586	1.18e-19	1.01e-18
MIXL1	1.22889	1.37e-19	1.16e-18
IL1B	1.14392	1.59e-19	1.34e-18
CHRNA7	1.12306	1.85e-19	1.55e-18
LOC101929970	1.12306	1.85e-19	1.55e-18
LOC101929268	1.01704	1.97e-19	1.64e-18
CCR6	1.33376	1.99e-19	1.66e-18
C1QL1	1.47344	2.01e-19	1.67e-18
SLC5A8	1.49629	2.05e-19	1.7e-18
FAM9B	1.00955	3e-19	2.45e-18
COL9A1	1.39158	4.21e-19	3.4e-18
SLC2A5	1.24201	4.47e-19	3.6e-18
DKK1	1.24118	7.72e-19	6.08e-18
C10orf82	1.17307	9.2e-19	7.19e-18
CXCL6	1.10801	1.01e-18	7.88e-18
LOC105376557	1.20334	1.39e-18	1.08e-17
GRIA2	1.18304	1.62e-18	1.25e-17
SLC5A7	1.25	1.92e-18	1.46e-17
FOXI2	1.20566	2.11e-18	1.61e-17
SUPT20HL2	1.4683	2.98e-18	2.24e-17
CSF3	1.52385	3.57e-18	2.67e-17
APOB	1.16502	4.09e-18	3.04e-17
CP	1.16962	6.56e-18	4.8e-17
ADAMTS4	1.2032	7e-18	5.11e-17
KY	1.12883	7.04e-18	5.14e-17
NELL2	1.00927	9.05e-18	6.54e-17
ACP7	1.11244	9.68e-18	6.97e-17
GRIA4	2.83188	1.21e-17	8.65e-17
PADI3	1.66342	1.27e-17	9.1e-17
CCR4	1.03782	1.46e-17	1.04e-16
LINC01204	1.40296	1.54e-17	1.09e-16
IL6	1.39708	1.6e-17	1.13e-16
P2RY10	1.08173	1.62e-17	1.14e-16
CCDC129	1.28281	1.91e-17	1.34e-16
CYP4B1	1.10248	2.68e-17	1.85e-16
CYP3A5	1.12833	3.58e-17	2.45e-16
SERPINB3	1.49591	4.06e-17	2.76e-16
GABRE	1.04048	4.87e-17	3.29e-16
SERPINA5	1.198	7.05e-17	4.72e-16
CPA6	1.14665	7.31e-17	4.88e-16
TLR10	1.02636	9.89e-17	6.55e-16
CPNE6	1.3005	1.24e-16	8.13e-16
HSD17B13	1.38046	1.38e-16	9.06e-16
LOC101929163	1.01276	2.12e-16	1.36e-15
FPR2	1.10833	2.63e-16	1.68e-15
OCA2	1.2231	4.77e-16	2.99e-15
EREG	1.31664	9.08e-16	5.54e-15
CXCL2	1.31589	1.23e-15	7.43e-15
STAC2	1.08849	1.75e-15	1.04e-14
SPHKAP	1.12362	1.75e-15	1.04e-14
DMBT1	1.35675	1.89e-15	1.13e-14
TBX5	1.0422	1.95e-15	1.16e-14
NOS1	1.01276	2.04e-15	1.21e-14
TSHB	1.0696	2.16e-15	1.28e-14
TMEM213	1.36275	2.55e-15	1.5e-14
OLFM4	1.49142	2.67e-15	1.57e-14
SELE	1.16481	3.13e-15	1.83e-14
PON3	1.04589	3.2e-15	1.86e-14
QRFPR	1.23422	3.93e-15	2.27e-14
OVCH2	1.01813	4.34e-15	2.5e-14
SLITRK3	1.17568	5.49e-15	3.13e-14
SAMMSON	1.04037	5.89e-15	3.35e-14
GALR1	1.09798	6.45e-15	3.65e-14
SLCO4C1	1.08058	6.83e-15	3.86e-14
DCC	1.16037	7.09e-15	4e-14
MFAP5	1.06696	7.82e-15	4.4e-14
TRIM29	1.03253	8.08e-15	4.54e-14
EPGN	1.24519	8.93e-15	5e-14
GABRP	1.08893	1.19e-14	6.6e-14
MIR221	1.36797	1.34e-14	7.41e-14
HTR1B	1.14096	2.96e-14	1.59e-13
SLC1A6	1.1704	4.57e-14	2.43e-13
LOC101927417	1.16453	4.74e-14	2.51e-13
FCGR3B	1.11064	5.4e-14	2.85e-13
GJB4	1.04587	5.69e-14	2.99e-13
GPX2	1.0326	6.2e-14	3.25e-13
GLRA4	1.1967	6.51e-14	3.41e-13
CXCL1	1.13773	9.15e-14	4.72e-13
BTN1A1	1.03422	1.03e-13	5.28e-13
DSG3	1.19961	1.06e-13	5.43e-13
PROK1	1.12254	1.07e-13	5.51e-13
LINC02188	1.13921	1.26e-13	6.43e-13
NOS2	1.10614	1.3e-13	6.62e-13
CHP2	1.19176	1.36e-13	6.92e-13
LOC283299	1.09039	1.47e-13	7.45e-13
MIR770	1.40554	1.51e-13	7.63e-13
KRT23	1.07053	1.53e-13	7.71e-13
VTCN1	1.07822	1.62e-13	8.17e-13
LIX1	1.16929	1.85e-13	9.31e-13
HAPLN1	1.29488	2.15e-13	1.07e-12
MIR4645	1.18917	2.8e-13	1.39e-12
GPR15	1.31205	3.56e-13	1.75e-12
NR4A3	1.05622	3.65e-13	1.79e-12
SLC5A5	1.09146	3.83e-13	1.88e-12
NUGGC	1.14128	5.61e-13	2.71e-12
C9orf129	1.08118	6.14e-13	2.96e-12
SLC46A2	1.1871	7.18e-13	3.45e-12
PI16	1.18498	7.22e-13	3.47e-12
LTF	1.39471	7.87e-13	3.77e-12
COLEC10	1.88171	1.04e-12	4.95e-12
LINC01671	1.04279	1.17e-12	5.51e-12
C11orf87	1.46231	1.3e-12	6.11e-12
CIDEC	1.19035	1.35e-12	6.35e-12
LINC01783	1.05696	2.52e-12	1.15e-11
FAM196B	1.20011	2.91e-12	1.33e-11
SULT1C2P1	1.07016	3.33e-12	1.51e-11
INSRR	1.0323	4.16e-12	1.88e-11
EMX2	1.02521	4.52e-12	2.03e-11
TGM4	1.96845	5.07e-12	2.28e-11
TMPRSS11A	1.49741	6e-12	2.67e-11
ACTBL2	1.08189	6.06e-12	2.7e-11
TBX4	1.16232	6.84e-12	3.03e-11
PRICKLE2-AS1	1.19314	7.09e-12	3.14e-11
BMP5	1.51059	7.2e-12	3.18e-11
EVPLL	1.04164	1.14e-11	4.94e-11
MALRD1	1.06572	1.47e-11	6.32e-11
SLC7A14	1.02064	1.57e-11	6.7e-11
KCNB2	1.10107	1.89e-11	8.01e-11
TRPA1	1.30966	3e-11	1.25e-10
JCHAIN	1.02941	3.06e-11	1.28e-10
DUOXA2	1.13006	3.26e-11	1.36e-10
KRT4	1.3571	6.3e-11	2.56e-10
LINC00494	1.02467	7.5e-11	3.03e-10
LINC02325	1.04949	7.85e-11	3.17e-10
PCDH8	1.0188	8.35e-11	3.36e-10
CLEC17A	1.00057	8.35e-11	3.36e-10
LINC01345	1.11785	8.65e-11	3.48e-10
HECW1	1.20259	1.32e-10	5.22e-10
LOC643711	1.07489	2.2e-10	8.57e-10
FAM163A	1.07571	2.26e-10	8.81e-10
HAND2-AS1	2.02364	2.27e-10	8.85e-10
SERPINB13	1.17987	2.31e-10	8.98e-10
SEMG1	1.41744	2.42e-10	9.4e-10
SLC9A4	1.09168	2.51e-10	9.73e-10
AQP2	1.20483	2.54e-10	9.84e-10
GPR31	1.02937	3.08e-10	1.19e-09
ATP6V0A4	1.11313	3.42e-10	1.31e-09
LGSN	1.09207	4.03e-10	1.54e-09
MIR27A	1.23871	4.6e-10	1.75e-09
IL13	1.0684	5.96e-10	2.24e-09
SERPINB7	1.04387	6.99e-10	2.61e-09
CRYGD	1.87591	9.45e-10	3.48e-09
PNMA6E	1.19622	1.29e-09	4.7e-09
CXCL3	1.19851	1.73e-09	6.23e-09
IL22RA2	1.51927	3.66e-09	1.28e-08
CLEC4C	1.10381	3.9e-09	1.36e-08
NCAM1-AS1	1.06672	4.76e-09	1.64e-08
FGFBP1	1.07216	5.24e-09	1.8e-08
LY6D	1.11145	7.32e-09	2.48e-08
SCGB1A1	1.0815	8.35e-09	2.81e-08
SERPINB4	1.32606	1.33e-08	4.38e-08
LOC101929415	1.13272	2.12e-08	6.86e-08
ADRB3	1.24233	2.36e-08	7.63e-08
FAM83C	1.0728	2.6e-08	8.37e-08
TBX22	1.12787	3.22e-08	1.03e-07
LINC01484	1.07792	5.47e-08	1.72e-07
HMX3	1.2594	5.54e-08	1.73e-07
HTR2C	1.83751	5.84e-08	1.82e-07
HP	1.01861	1.27e-07	3.84e-07
MIR23A	1.31328	1.27e-07	3.84e-07
KLHL1	1.78141	1.33e-07	4.01e-07
COL6A5	1.0039	2.2e-07	6.48e-07
TRIM31	1.58412	3.16e-07	9.18e-07
HAND2	1.65708	3.4e-07	9.82e-07
SERPINB11	1.04577	3.8e-07	1.09e-06
CARTPT	1.17349	5.66e-07	1.6e-06
SCEL	1.78116	5.86e-07	1.66e-06
KRT13	1.00049	1.23e-06	3.37e-06
TRH	1.29925	4.22e-06	1.1e-05
CLEC6A	1.13268	4.24e-06	1.1e-05
PGLYRP3	1.04465	5.56e-06	1.43e-05
UGT3A1	1.18359	7.49e-06	1.9e-05
MYH2	1.24896	7.51e-06	1.91e-05
LRRC15	1.65566	7.86e-06	1.99e-05
EPYC	2.6737	8.82e-06	2.22e-05
CALHM3	1.65265	1.1e-05	2.74e-05
GPRC6A	1.59621	1.21e-05	3e-05
UPK1B	2.24724	5.6e-05	0.000129
HPR	1.42663	7.65e-05	0.000174
LOC101929538	2.98661	7.95e-05	0.00018
HTR1E	1.06442	8.01e-05	0.000181
MUC21	1.3145	0.000104	0.000233
PATE1	1.27063	0.000113	0.000251
SCN1A	1.3198	0.000116	0.000259
SERPINA4	1.04518	0.00016	0.000349
FCRL1	1.09886	0.000246	0.000525
SMR3B	1.33983	0.000276	0.000586
GYS2	1.05746	0.000337	0.000708
TCL1A	1.17903	0.000389	0.00081
CASP14	1.16204	0.00084	0.001678
MS4A1	1.03385	0.000947	0.00188
LOC100130331	1.52327	0.001121	0.002203
TM4SF20	1.2002	0.001249	0.002441
NNAT	1.16635	0.002099	0.003983
CDC20B	2.1633	0.002312	0.004358
PSMA8	1.20725	0.003623	0.006642
LINC01940	1.20005	0.007428	0.013004
PRAMENP	1.15389	0.007585	0.013262
LINC00836	1.1173	0.007613	0.013309
SPRR3	1.35687	0.009238	0.015927
RBM46	1.23106	0.009277	0.015986
IVL	1.03236	0.010219	0.017478
IL17A	1.2106	0.011371	0.019305
GUCA2A	3.30138	0.011566	0.019607
FCRL4	1.55981	0.015774	0.026163
PATE4	1.0131	0.016965	0.028027
AICDA	1.58668	0.030633	0.048381
CFAP65	-1.16006	4.6e-39	3.16e-37
SNHG19	-1.19642	1.11e-37	6.58e-36
LOC101927702	-1.14472	3.11e-36	1.56e-34
NUDT8	-1.45565	6.05e-35	2.66e-33
TMEM238	-1.03284	6.15e-35	2.7e-33
HAGHL	-1.28706	2.13e-33	7.53e-32
RN7SK	-4.78331	6.62e-33	2.23e-31
SNHG25	-1.19041	3.66e-32	1.13e-30
UNQ6494	-1.10122	4e-31	1.08e-29
HES4	-1.01867	4.28e-30	1.03e-28
DNASE1L2	-1.07557	2.62e-28	5.09e-27
SNORD60	-1.25721	9.51e-27	1.59e-25
ACTL10	-1.16575	1.8e-26	2.92e-25
CRYBA2	-1.15218	5.29e-26	8.21e-25
AKR7A3	-1.44738	9.53e-26	1.43e-24
F12	-1.06649	1.48e-25	2.19e-24
SLC45A2	-1.71978	1.38e-24	1.85e-23
SNORD104	-1.1438	1.66e-24	2.22e-23
CCDC78	-1.26008	5.82e-24	7.42e-23
CPNE7	-1.24555	4.06e-23	4.75e-22
KISS1R	-1.84886	6.17e-23	7.1e-22
TBX10	-1.77235	1.63e-22	1.8e-21
SYCE1L	-1.17142	4.39e-22	4.65e-21
C4orf48	-1.02809	7.41e-22	7.66e-21
ENPP3	-1.19704	9.33e-22	9.56e-21
KLK15	-1.11757	1.43e-21	1.45e-20
VSTM2L	-1.10867	1.55e-21	1.57e-20
LOC105377448	-1.05326	1.68e-19	1.41e-18
DLX2-DT	-1.02043	1.9e-19	1.59e-18
FABP5	-1.41293	1.36e-18	1.05e-17
CCER2	-1.00373	2.54e-18	1.92e-17
HOXD1	-1.03365	7.19e-18	5.23e-17
SMIM22	-1.14205	2.32e-17	1.62e-16
LKAAEAR1	-1.23546	3.06e-17	2.11e-16
ALG1L	-1.12823	3.17e-17	2.18e-16
LRFN2	-1.03598	3.18e-17	2.18e-16
HIST1H4B	-1.26502	3.69e-17	2.52e-16
LINC00930	-1.07253	5.57e-17	3.75e-16
SLC22A31	-1.29515	1.78e-16	1.15e-15
SNORA3B	-1.00125	2.39e-16	1.53e-15
BLOC1S5-TXNDC5	-1.06831	2.43e-16	1.56e-15
PCSK1N	-1.0794	4.05e-16	2.55e-15
2020-03-10	-1.00704	6.55e-16	4.06e-15
MMP26	-1.08836	6.63e-16	4.11e-15
IGSF21	-1.16352	7.45e-16	4.59e-15
PHGR1	-1.28066	7.75e-16	4.77e-15
CASC11	-1.62359	1.03e-15	6.28e-15
OR2B6	-1.04634	1.08e-15	6.57e-15
FAM57B	-1.53919	1.51e-15	9.08e-15
IGF2	-1.45858	1.66e-15	9.89e-15
KCNMB2	-1.36907	1.92e-15	1.14e-14
LIPF	-3.49221	2.2e-15	1.3e-14
NETO1	-1.99054	2.27e-15	1.34e-14
CASC8	-1.01302	2.97e-15	1.73e-14
TFF3	-1.33279	3.22e-15	1.88e-14
CNPY3-GNMT	-1.06064	3.48e-15	2.02e-14
GNMT	-1.06064	3.48e-15	2.02e-14
LINC01511	-1.08729	6.04e-15	3.43e-14
LOC102725072	-1.20257	1.09e-14	6.06e-14
SNORA73B	-3.19102	1.67e-14	9.15e-14
COL9A2	-1.10405	2.28e-14	1.24e-13
RNF157	-1.02022	2.66e-14	1.44e-13
UGT2B28	-1.4768	3.07e-14	1.65e-13
GPC5-AS1	-1.60804	1.35e-13	6.84e-13
PNMA5	-2.84612	1.64e-13	8.29e-13
EWSAT1	-1.10972	2.03e-13	1.02e-12
PANX3	-1.52343	2.45e-13	1.22e-12
LY6L	-4.99552	3.08e-13	1.52e-12
UNC5A	-1.31623	4.92e-13	2.39e-12
NOTUM	-1.46819	6.94e-13	3.33e-12
LINC02139	-1.40182	8.38e-13	4e-12
CST1	-2.6338	1.41e-12	6.61e-12
NR2E1	-1.77777	1.5e-12	7e-12
MNX1-AS2	-1.0486	1.5e-12	7e-12
SNORD15B	-3.01623	3.64e-12	1.65e-11
NXF4	-1.41197	6e-12	2.68e-11
MYT1	-1.21993	7.12e-12	3.15e-11
SMIM21	-1.83221	7.74e-12	3.41e-11
OR51H1	-1.21393	8.03e-12	3.53e-11
FAM183BP	-1.07483	1.07e-11	4.63e-11
C19orf81	-1.41707	1.96e-11	8.32e-11
HBQ1	-1.35515	2.15e-11	9.08e-11
CLEC18C	-1.14509	4.05e-11	1.68e-10
LOC105374428	-1.13407	4.68e-11	1.92e-10
CCDC83	-1.38854	6.64e-11	2.7e-10
NUTM2F	-1.31813	6.98e-11	2.83e-10
DEFA5	-2.56067	7.24e-11	2.93e-10
SCARNA13	-1.89972	8.42e-11	3.39e-10
SCRT1	-1.92995	1.01e-10	4.02e-10
ATP12A	-2.11048	1.61e-10	6.32e-10
AMH	-1.02177	1.71e-10	6.71e-10
SCARNA7	-5.23487	2.13e-10	8.32e-10
HIST1H2AH	-1.03179	4.22e-10	1.61e-09
DEFA6	-3.06565	7.6e-10	2.83e-09
SCGN	-1.24508	7.97e-10	2.95e-09
RNU6-2	-1.02885	8.19e-10	3.03e-09
RNY1	-1.0224	8.39e-10	3.1e-09
FAM71F1	-1.20455	8.56e-10	3.17e-09
LOC105373191	-2.44553	1.11e-09	4.06e-09
LOC101930094	-1.10852	1.18e-09	4.31e-09
IFT74-AS1	-1.02576	1.22e-09	4.46e-09
HIST2H2AA4	-1.18412	1.66e-09	5.98e-09
TMED11P	-1.51991	2.37e-09	8.44e-09
SNORD17	-5.94994	2.84e-09	1e-08
LRTM2	-1.39533	2.88e-09	1.02e-08
COX7B2	-1.06013	3.03e-09	1.07e-08
LINC02259	-1.54732	3.74e-09	1.3e-08
CCL25	-1.62391	4.25e-09	1.47e-08
TDO2	-1.18068	5.71e-09	1.95e-08
CLPSL1	-1.51458	5.98e-09	2.04e-08
SNORD3B-2	-1.03275	8.22e-09	2.77e-08
FOXG1	-1.18099	1e-08	3.36e-08
HIST1H2AJ	-1.05827	1.03e-08	3.44e-08
CELA3B	-1.68571	1.09e-08	3.62e-08
HIST1H4A	-1.27334	1.45e-08	4.76e-08
KCNU1	-1.03473	1.56e-08	5.11e-08
CEACAM16	-1.1731	1.93e-08	6.29e-08
SCARNA21	-1.71728	2.72e-08	8.73e-08
CALML5	-4.13631	3.67e-08	1.17e-07
CA1	-1.12156	4.72e-08	1.49e-07
ERAS	-1.08453	5.66e-08	1.77e-07
ETV4	-2.67389	5.67e-08	1.77e-07
LY6K	-1.06273	6.27e-08	1.95e-07
LAMP5-AS1	-1.27824	6.89e-08	2.14e-07
CPLX2	-2.10131	6.9e-08	2.14e-07
RNVU1-19	-1.19147	9.17e-08	2.81e-07
LINC01234	-1.01777	1.14e-07	3.47e-07
UGT2B11	-1.2873	1.24e-07	3.76e-07
SLC6A18	-3.88749	1.36e-07	4.11e-07
KRT72	-1.7537	1.55e-07	4.65e-07
OSTM1-AS1	-1.18829	1.59e-07	4.76e-07
RNVU1-15	-1.93188	1.68e-07	5.01e-07
LINC02153	-1.12603	1.94e-07	5.74e-07
SGCZ	-2.1132	2.1e-07	6.21e-07
LINC01758	-1.01965	2.35e-07	6.93e-07
PURPL	-1.72625	2.39e-07	7.02e-07
TMPRSS11GP	-1.73899	2.83e-07	8.28e-07
FFAR4	-1.06805	3.07e-07	8.93e-07
SULT6B1	-1.03844	3.18e-07	9.23e-07
SNORA74A	-4.50985	3.25e-07	9.42e-07
SCARNA12	-2.38531	3.72e-07	1.07e-06
SPZ1	-6.65071	4.1e-07	1.18e-06
SCARNA5	-4.56603	4.54e-07	1.3e-06
LOC286083	-1.12748	4.58e-07	1.31e-06
TMBIM7P	-1.19337	6.48e-07	1.82e-06
SLC6A4	-1.11	8.64e-07	2.41e-06
LOC101928894	-1.54913	8.95e-07	2.49e-06
LINC01477	-1.47041	9.93e-07	2.75e-06
RHAG	-1.32138	1e-06	2.78e-06
RN7SL3	-1.41827	1.1e-06	3.03e-06
DBH	-1.85323	1.77e-06	4.78e-06
DIO1	-1.07813	1.78e-06	4.81e-06
LINC01251	-1.61586	1.99e-06	5.34e-06
TDRG1	-1.27092	1.99e-06	5.35e-06
SCGB2A2	-2.36992	2.06e-06	5.53e-06
MIR3609	-5.24806	2.12e-06	5.67e-06
ACY3	-1.96314	2.14e-06	5.73e-06
WFDC5	-1.72183	2.19e-06	5.84e-06
PIP	-1.3364	2.54e-06	6.74e-06
SNORA74B	-5.11518	2.7e-06	7.15e-06
DYTN	-1.14503	2.9e-06	7.66e-06
LINC01994	-1.57462	3.63e-06	9.5e-06
LINC01099	-1.14893	3.68e-06	9.62e-06
ACTL6B	-1.70837	4.58e-06	1.19e-05
ALB	-1.16308	6.72e-06	1.71e-05
LOC440084	-1.12633	6.81e-06	1.74e-05
ADAM7	-1.02826	8.22e-06	2.08e-05
CST2	-1.19422	8.6e-06	2.17e-05
CRYBA4	-1.07538	9.32e-06	2.34e-05
MIR8066	-1.47816	1.2e-05	2.97e-05
LIPN	-1.52338	1.41e-05	3.47e-05
RTBDN	-1.02087	1.51e-05	3.7e-05
LOC100505797	-1.89671	1.67e-05	4.08e-05
SPATA8	-1.61346	2.81e-05	6.71e-05
GLP1R	-1.64013	3.42e-05	8.1e-05
ZDHHC22	-1.99677	5.08e-05	0.000118
CELP	-1.07664	5.1e-05	0.000118
GUCY1B2	-1.09817	5.48e-05	0.000127
LOC101927159	-1.05463	5.72e-05	0.000132
TEX19	-1.01371	5.72e-05	0.000132
PDE6H	-2.07868	6.53e-05	0.000149
INSL5	-1.88076	7.03e-05	0.00016
LINC00308	-1.81754	8.86e-05	0.000199
UNC13A	-1.07928	9.42e-05	0.000212
TERB2	-1.00934	0.000106	0.000237
CABS1	-1.85006	0.000108	0.00024
TMEM190	-1.29788	0.000113	0.00025
KRT20	-1.53346	0.000115	0.000255
SCARNA10	-5.29293	0.00012	0.000265
GLRA3	-2.85155	0.000125	0.000276
SCRT2	-3.01079	0.000126	0.000279
SHISAL2B	-1.71215	0.000154	0.000337
SLC18A3	-1.07897	0.000187	0.000405
IRS4	-2.5501	0.000239	0.000511
THRSP	-2.25587	0.000286	0.000606
HTR3C	-1.24631	0.00029	0.000614
LGI1	-1.44971	0.000293	0.000619
GBX2	-3.63877	0.000317	0.000668
ECEL1	-1.53186	0.000321	0.000676
SYT5	-1.62968	0.000327	0.000689
LINC00355	-1.15786	0.000371	0.000774
MIR5691	-1.11035	0.000383	0.000798
PRR27	-2.23194	0.000419	0.00087
MUCL1	-1.0131	0.000424	0.000878
OBP2B	-2.60185	0.000489	0.001007
CDK5R2	-1.10197	0.00054	0.001105
TG	-1.52845	0.00057	0.001163
CTRB2	-1.42761	0.000604	0.001228
LHX5	-2.34578	0.000631	0.001279
LINC01956	-1.42147	0.000741	0.00149
CSAG1	-1.72925	0.000873	0.00174
SNORA49	-1.87984	0.000961	0.001908
MAGEA12	-1.74254	0.000978	0.001939
LIN28B	-1.30676	0.001084	0.002135
OBP2A	-2.07709	0.001116	0.002194
GACAT2	-1.1291	0.001152	0.002261
PAGE2B	-1.22728	0.001275	0.00249
GIF	-1.00308	0.001561	0.003013
SNORA12	-3.74275	0.001634	0.003148
HIST1H3I	-1.47304	0.0017	0.003266
NXPH1	-1.36563	0.001889	0.003609
MAGEC2	-1.66348	0.001984	0.00378
LOC101928775	-1.21344	0.002008	0.003822
SOHLH1	-1.21117	0.002123	0.004027
LINC01777	-1.20267	0.002232	0.004218
GBX1	-1.00921	0.002339	0.004406
SCARNA6	-2.19604	0.002354	0.004432
SLC38A8	-2.27062	0.002397	0.004506
AZU1	-1.8382	0.002555	0.004787
CATSPERD	-1.0893	0.002815	0.005244
LINC02050	-1.40758	0.002968	0.005513
TCAM1P	-1.09554	0.00311	0.005758
TPTE	-1.3714	0.003203	0.005918
CA6	-2.07175	0.004021	0.007329
LINC01976	-1.04279	0.004347	0.007878
DGKK	-1.91268	0.004486	0.008116
TRPC5	-1.51157	0.004628	0.008362
DDX4	-2.23563	0.004795	0.008649
TAC3	-2.27577	0.005467	0.009778
GRXCR1	-1.58221	0.005526	0.009878
HTN1	-1.25885	0.005548	0.009916
ST7-AS2	-1.77974	0.006145	0.010904
SH2D1A	-1.02115	0.00638	0.01129
CYP3A4	-1.04954	0.007865	0.01372
FEZF2	-1.29974	0.008273	0.014367
CD5L	-1.6368	0.008562	0.014836
TMEM207	-1.54043	0.008691	0.015037
LOC100505658	-1.34057	0.010484	0.017903
POU5F2	-1.14405	0.010725	0.018286
SNORA23	-3.31212	0.010895	0.018561
DKK4	-1.47165	0.010987	0.018709
GAPDHS	-2.33517	0.011178	0.019002
ZBTB20-AS5	-4.54786	0.01153	0.019552
IDO2	-1.64689	0.012238	0.020643
LINC01611	-1.15542	0.01393	0.023331
OR8G5	-1.59537	0.01397	0.023389
LINC01467	-1.37608	0.014564	0.024323
C5orf64	-1.44935	0.018215	0.029978
SERPINA6	-1.02009	0.018474	0.030389
SNCB	-1.11895	0.019082	0.031316
SNORA74D	-2.89238	0.021888	0.035505
2020-03-04	-1.20498	0.022214	0.035982
LINC02178	-2.45572	0.023757	0.038284
DYDC2	-1.0163	0.023855	0.038422
CELA3A	-1.30001	0.024931	0.040031
CHRNB2	-1.03613	0.025331	0.040636
MT4	-1.32604	0.025504	0.040897
UGT2B10	-1.25097	0.026274	0.042014
PRAMEF12	-1.18435	0.029807	0.047172
